# Supplementary material for: rGO functionalized (Ni,Fe)-OH for an efficient trifunctional catalyst in low-cost hydrogen generation via urea decomposition as a proxy anodic reaction
Source: Royal Society of Chemistry journal article supplement (doi:10.1039/d2dt01197b), 2022-01-01
Supplement: d2dt01197b1.pdf [file d2dt01197b1.pdf]

## **Electronic Supplementary Material (ESI): Supporting Information**

### **rGO functionalized (Ni, Fe)-OH for an efficient trifunctional catalyst in low-cost hydrogen generation via urea decomposition as a proxy anodic reaction**

Nabeen K. Shrestha,<sup>a</sup> Supriya A. Patil,<sup>\*b</sup> Akbar I. Inamdar,<sup>a</sup> Sunjung Park,<sup>a</sup> Seungun Yeon,<sup>a</sup> Giho Shin,<sup>a</sup> Sangeun Cho,<sup>a</sup> Hyungsang Kim,<sup>a</sup> Hyunsik Im<sup>a\*</sup>

<sup>a</sup>Division of Physics and Semiconductor Science, Dongguk University-Seoul, Seoul 04620, Republic of Korea.

<sup>b</sup>Department of Nanotechnology and Advanced Materials Engineering, Sejong University, Seoul-05006, Republic of Korea.

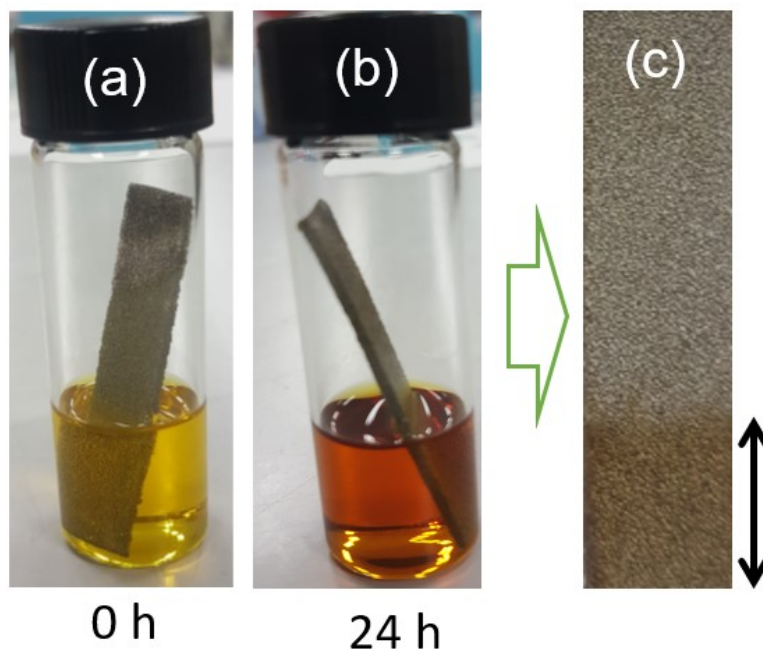

**Figure S1.** Photo images of (a) nickel foam immersed in an ethylene glycol-water (80:20 vol%) mixture solution containing  $20 \mu\text{mole mL}^{-1}$  of  $\text{FeCl}_3 \cdot 6\text{H}_2\text{O}$  and  $1 \text{mgL}^{-1}$  rGO at  $25^\circ\text{C}$ . Arrow shows the deposited film.

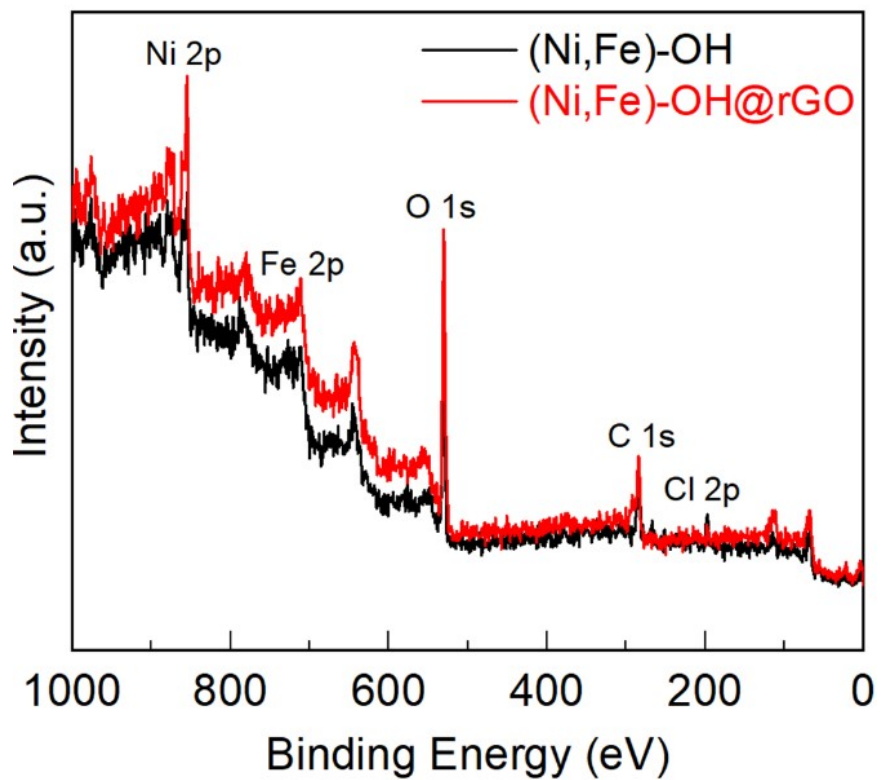

**Figure S2.** XPS survey spectra of the (Ni,Fe)-OH/NF and (Ni,Fe)-OH@rGO/NF electrodes.

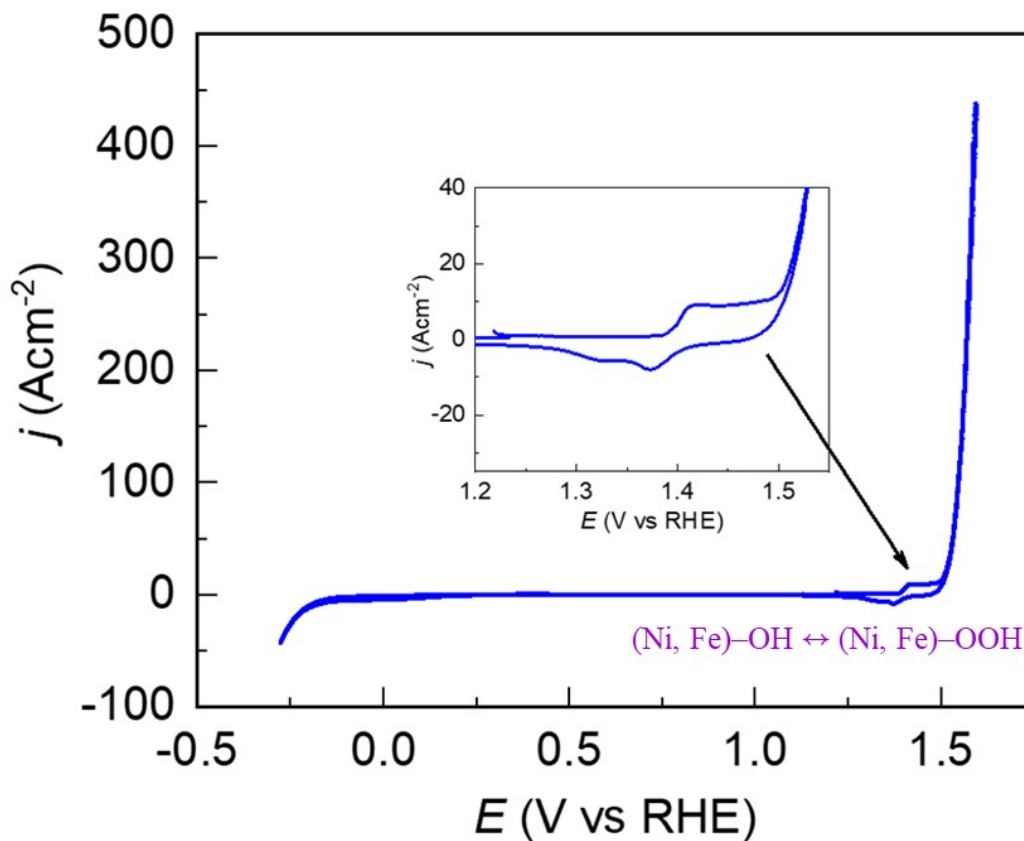

**Figure S3.** Cyclic voltammogram (CV) of the (Ni,Fe)-OH/NF electrode in the 1.0 M KOH electrolyte at a scan speed of 5 mVs<sup>-1</sup>. The inset image shows the enlarged CV view around the redox peak.

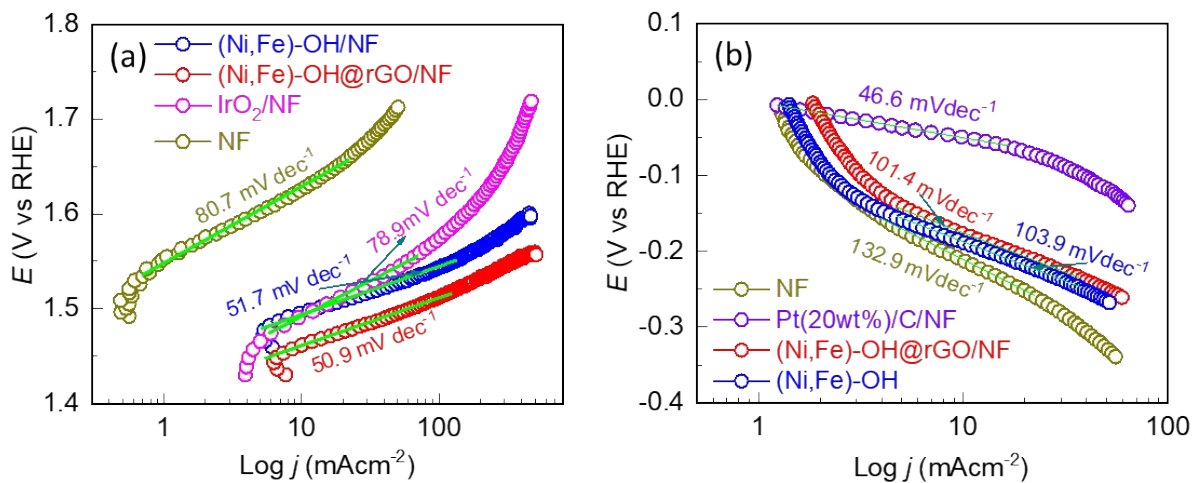

**Figure S4.** Tafel slopes extracted from the corresponding LSV polarization curves for (a) OER and (b) HER.

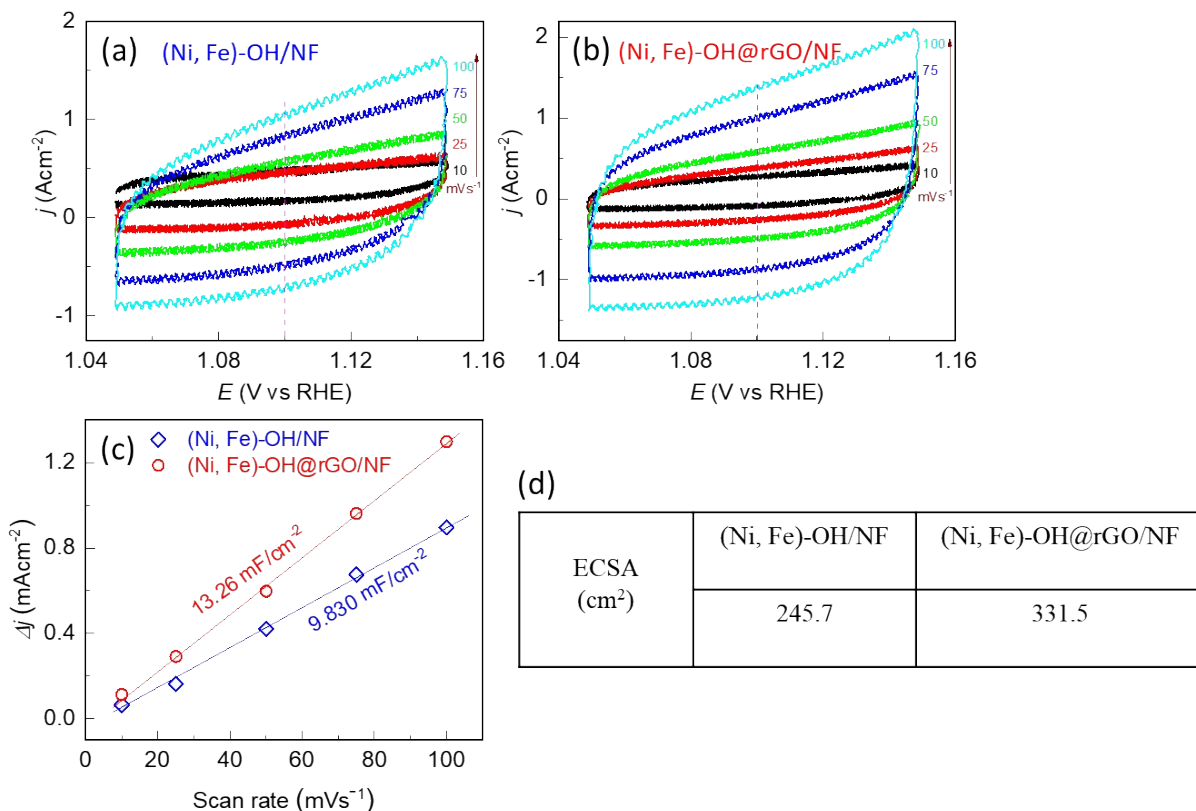

**Figure S5.** Cyclic voltammograms exhibited by the (a) (Ni,Fe)-OH/NF and (b) (Ni,Fe)-OH@rGO/NF electrodes at various scan rates in 1.0 M KOH solution.  $\Delta j$  vs scan rate linear plots providing the double layer capacitance ( $C_{dl}$ ) of the electrodes by the slope of the plots. (d) ECSA of the electrodes determined by the relation  $C_{dl}/C_s$ , where  $C_s$  is the specific capacitance of the electrodes in 1.M KOH solution and is generally taken as 0.04 mFcm<sup>-2</sup>.

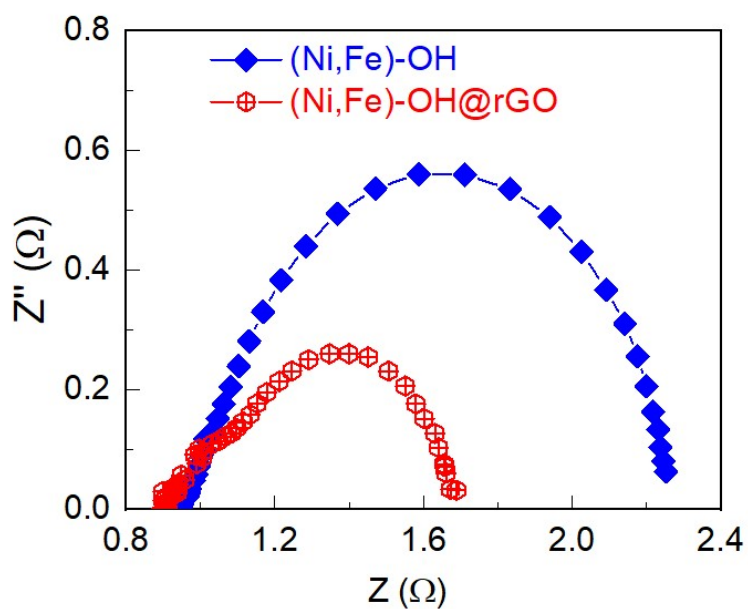

**Figure S6.** Nyquist spectra measured at 1.48 V (vs. RHE) in 1.0 M KOH solution.

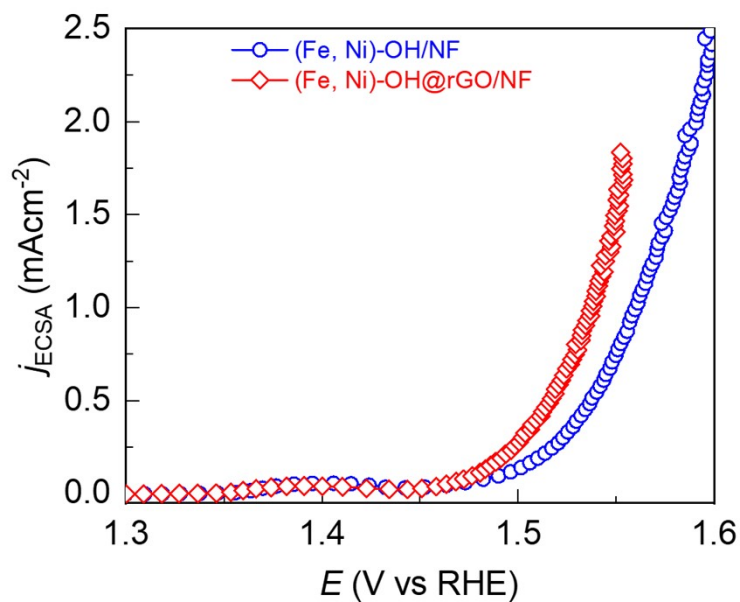

**Figure S7.** ESCA specific LSV polarization curves of the (Ni,Fe)-OH/NF and (Ni,Fe)-OH@rGO/NF electrodes in 1.0 M KOH solution.

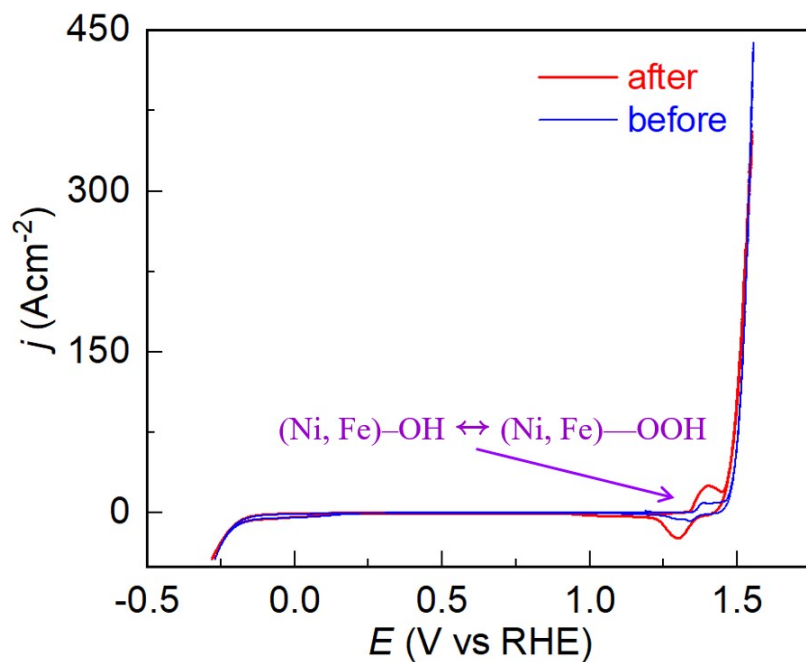

**Figure S8.** Cyclic voltammogram (CV) of the (Ni,Fe)-OH@rGO/NF electrode before and after the long-term stability test for 48 h (24 h at  $250 \text{ mAcm}^{-2}$  and 24 h at  $500 \text{ mAcm}^{-2}$ ). A scan speed of  $5 \text{ mVs}^{-1}$  was employed.



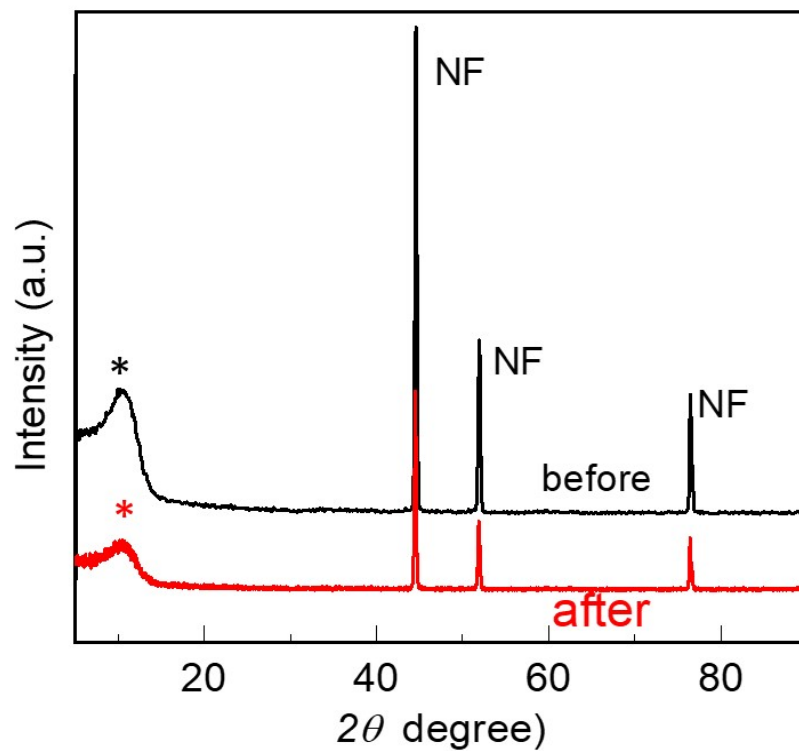

**Figure S9.** XRD patterns of the (Ni,Fe)-OH@rGO/NF electrode before and after the long-term stability test for 48 h (24 h at 250 mAcm<sup>-2</sup> and 24 h at 500 mAcm<sup>-2</sup>). The broad (\*) peak is from the film, while other peaks are from the nickel foam (NF) substrate.

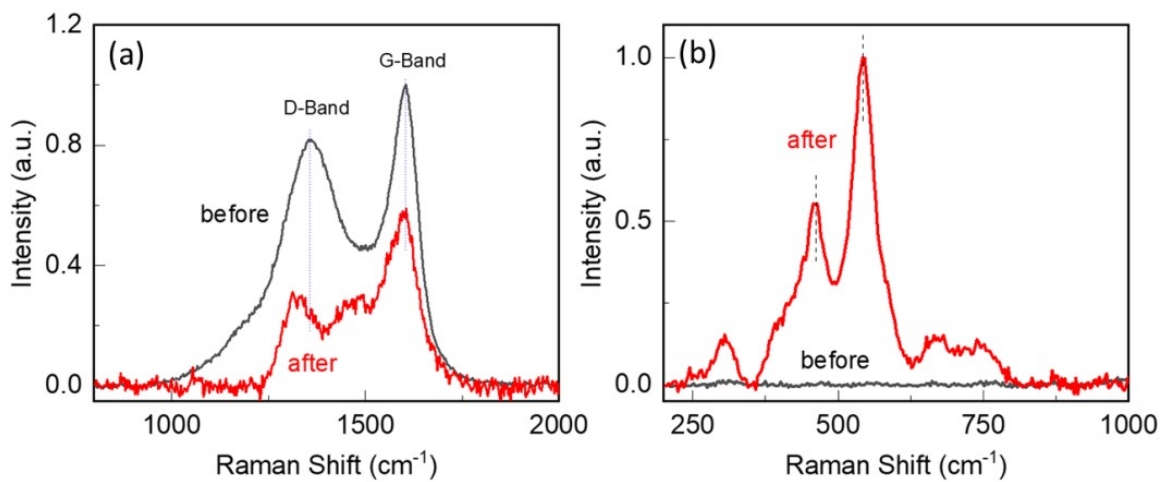

**Figure S10.** Raman spectra of the (Ni,Fe)-OH@rGO/NF electrode before and after the long-term stability test for 48 h (24 h at 250 mAcm<sup>-2</sup> and 24 h at 500 mAcm<sup>-2</sup>).

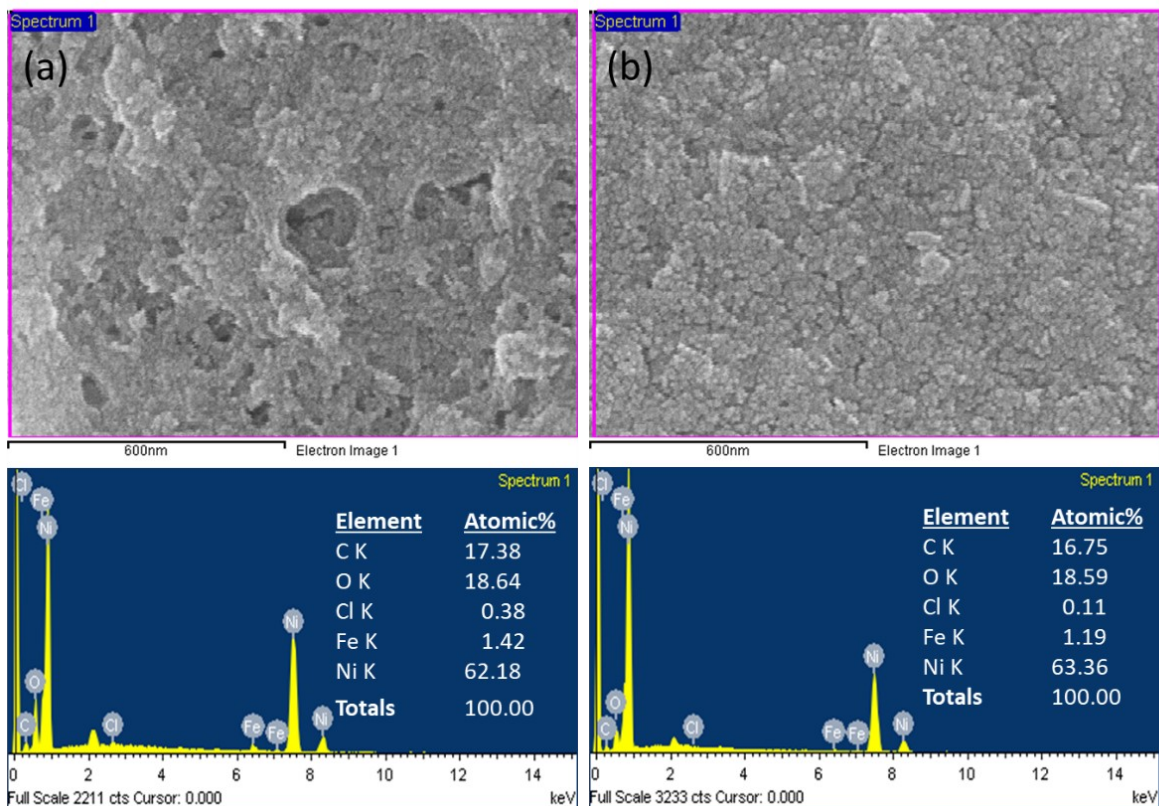

**Figure S11.** SEM images of the (Ni,Fe)-OH@rGO/NF electrode (a) before and (b) after the long-term stability test for 48 h (24 h at 250 mAcm<sup>-2</sup> and 24 h at 500 mAcm<sup>-2</sup>). (c) and (d) show the EDS elemental spectra and atomic percentages of the main constituting elements.

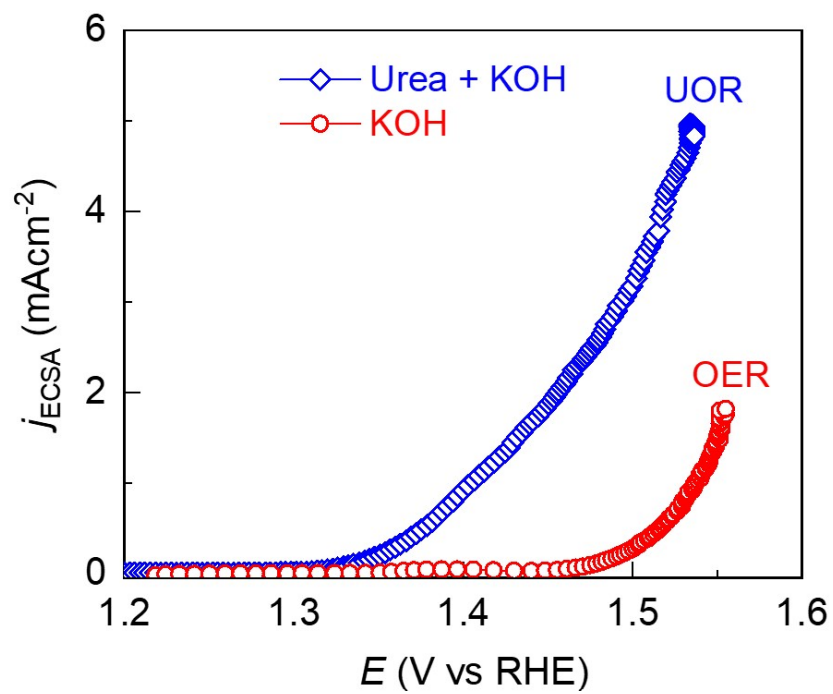

**Figure S12.** ECSA specific LSV polarization curves of the (Ni,Fe)-OH@rGO/NF electrode in 1.0 M KOH and 0.33 M urea-supplemented 1.0 M KOH aqueous electrolytes.

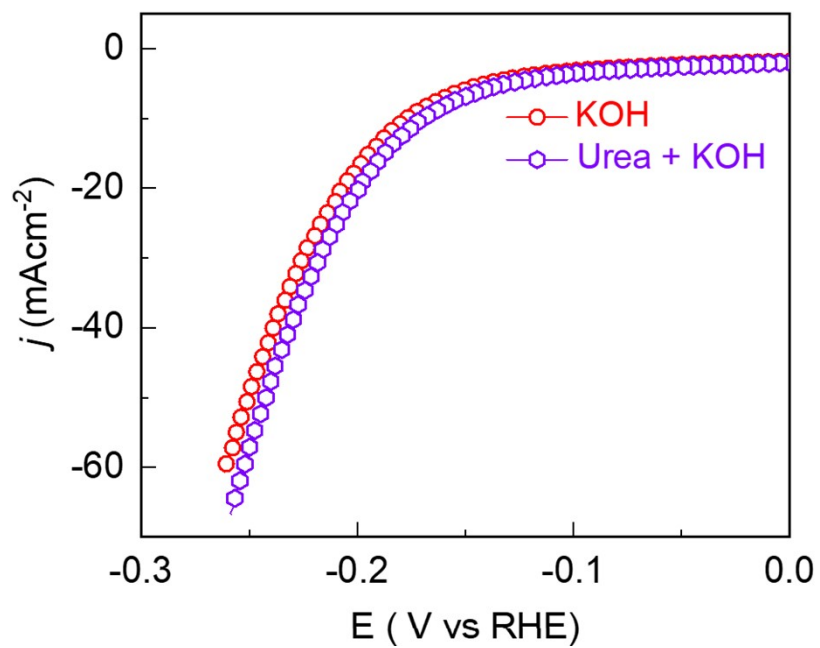

**Figure S13.** Cathodic polarization curves of the (Ni,Fe)-OH@rGO/NF electrode in 1.0 M KOH and 0.33 M urea-supplemented 1.0 M KOH electrolytes, revealing that the replacement of OER by UOR does not influence the HER activity of the electrode.

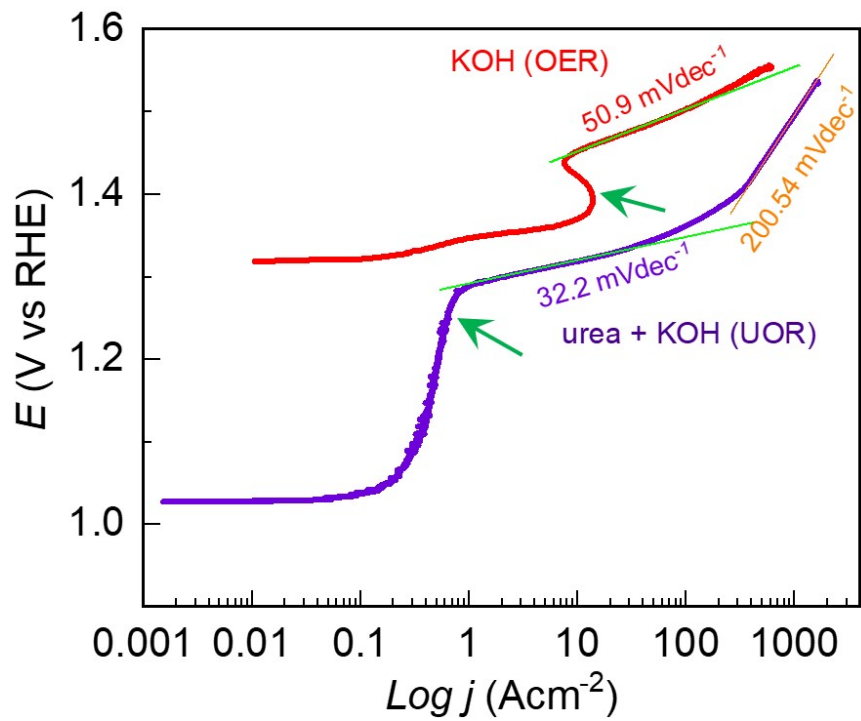

**Figure S14.** Tafel plots for UOR and OER plotted in the full potential ranges of the corresponding LSV polarization curves shown in 'Figure 9a'.

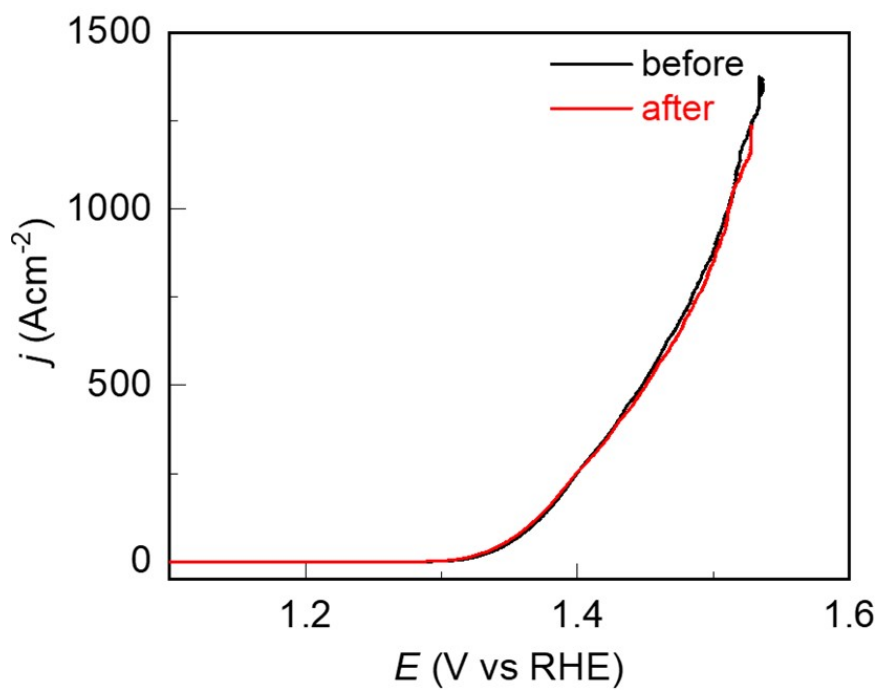

**Figure S15.** Anodic polarization curves of the (Ni,Fe)-OH@rGO/NF electrode in the 0.33 M urea-supplemented 1.0 M KOH electrolyte before and after the long-term stability test for 24 h at 10  $\text{mAcm}^{-2}$ .

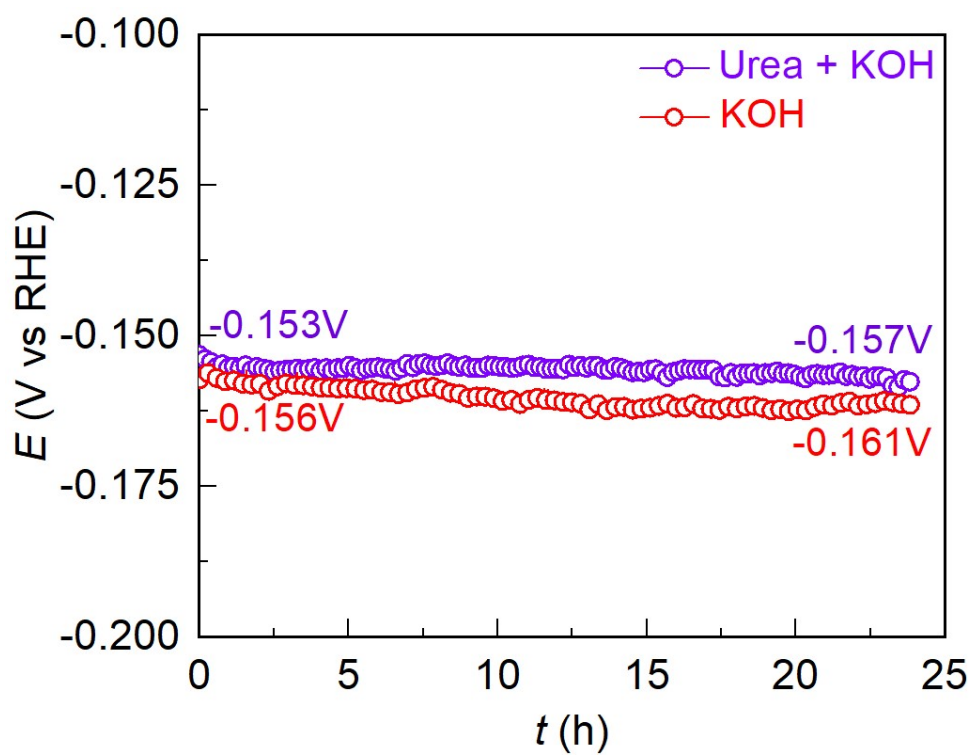

**Figure S16.** Chronopotentiometric stability test showing the long-term electrochemical durability of the (Ni,Fe)-OH@rGO/NF electrode against the HER in urea-free and 0.33 M urea-supplemented 1.0 M KOH electrolytes at  $-10 \text{ mAcm}^{-2}$ .



**Table S1.** Comparison of OER performance for (Ni,Fe)-OH@rGO/NF and (Ni,Fe)-OH/NF with those of state-of-the art electrocatalysts under alkaline conditions.

|    | Electrode materials          | Electrolyte | $j$<br>(mAcm <sup>-2</sup> )              | Overpotential<br>(mV) | Tafel slope<br>(mVdec <sup>-1</sup> ) | Ref              |            |      |   |
|----|------------------------------|-------------|-------------------------------------------|-----------------------|---------------------------------------|------------------|------------|------|---|
| 1  | (Ni,Fe)-OH@rGO/NF            | 1 M KOH     | 10                                        | 230                   | 50.9                                  | <b>This work</b> |            |      |   |
|    |                              |             | 50                                        | 250                   |                                       |                  |            |      |   |
|    |                              |             | 100                                       | 270                   |                                       |                  |            |      |   |
|    |                              |             | 250                                       | 300                   |                                       |                  |            |      |   |
|    |                              |             | 500                                       | 320                   |                                       |                  |            |      |   |
|    | (Ni,Fe)-OH/NF                |             | 10                                        | 260                   | 71.7                                  |                  |            |      |   |
|    |                              |             | 50                                        | 290                   |                                       |                  |            |      |   |
|    |                              |             | 100                                       | 310                   |                                       |                  |            |      |   |
|    |                              |             | 250                                       | 340                   |                                       |                  |            |      |   |
|    | IrO <sub>2</sub> /NF         |             | 10                                        | 260                   | 78.9                                  |                  |            |      |   |
|    |                              |             | 50                                        | 310                   |                                       |                  |            |      |   |
|    |                              |             | 100                                       | 340                   |                                       |                  |            |      |   |
|    |                              |             | 250                                       | 400                   |                                       |                  |            |      |   |
|    | 3                            |             | NFN-MOF/NF                                |                       | 10<br>250                             |                  | 240<br>335 | 58.8 | 1 |
|    | 4                            |             | NiFe/NiCo <sub>2</sub> O <sub>4</sub> /NF |                       | 10                                    |                  | 240        | 38.8 | 2 |
| 5  | MFN-MOFs(2:1)/NF             |             | 50                                        | 235                   | 55.4                                  | 3                |            |      |   |
| 6  | Ni-QDs@NC@rGO                |             | 10                                        | 265                   | 65.0                                  | 4                |            |      |   |
| 7  | Fe-O-Ni(OH) <sub>2</sub> /NF |             | 10                                        | 185                   |                                       | 5                |            |      |   |
|    |                              |             | 100                                       | 220                   |                                       |                  |            |      |   |
| 8  | NiFeOx/NF                    |             | 100                                       | 260                   | 28.0                                  | 6                |            |      |   |
| 9  | Ni-Fe NP/CFP                 |             | 10                                        | 210                   | -                                     | 7                |            |      |   |
|    |                              |             | 20                                        | 230                   |                                       |                  |            |      |   |
|    |                              |             | 100                                       | 270                   |                                       |                  |            |      |   |
| 10 | NiFe-LDH/Mxene/NF            |             | 10                                        | 229                   | 44.0                                  | 8                |            |      |   |
| 11 | Hier-NiFe@sCNTs              |             | 30                                        | 210                   | 65.7                                  | 9                |            |      |   |
|    |                              |             | 100                                       | 271                   |                                       |                  |            |      |   |

**Table S2.** Comparison of UOR performance for (Ni,Fe)-OH@rGO/NF with those of reported high-performance electrocatalysts.

|   | Electrode materials                         | Electrolyte            | $j$<br>(mAcm <sup>-2</sup> ) | Cell potential<br>(V) vs RHE | Overpotential<br>(V) | Ref.                 |
|---|---------------------------------------------|------------------------|------------------------------|------------------------------|----------------------|----------------------|
| 1 | (Ni,Fe)-<br>OH@rGO/NF                       | 1 M KOH<br>+ 0.33 urea | 100                          | 1.35                         | 0.98                 | <b>This<br/>work</b> |
|   |                                             |                        | 500                          | 1.43                         | 1.06                 |                      |
|   |                                             |                        | 1000                         | 1.49                         | 1.12                 |                      |
|   |                                             |                        | 1600                         | 1.53                         | 1.16                 |                      |
|   |                                             |                        |                              |                              |                      |                      |
|   | NC-PB@CNT                                   | 1 M KOH<br>+ 0.33 urea | 100                          | 1.41                         | 1.04                 | 10                   |
| 2 | NiS@Ni <sub>2</sub> S/NiMoO <sub>4</sub>    | 1 M KOH<br>+ 0.5 urea  | 100                          | 1.46                         | 1.09                 | 11                   |
|   |                                             |                        | 450                          | 1.78                         | 1.41                 |                      |
|   | NiIr-MOF/NF                                 | 1 M KOH<br>+ 0.5 urea  | 100                          | 1.349                        | 0.979                | 12                   |
|   |                                             |                        | 300                          | 1.350                        | 0.980                |                      |
| 3 | NiFeRh-LDH                                  | 1 M KOH<br>+ 0.33 urea | 100                          | 1.37                         | 1.00                 | 13                   |
|   |                                             |                        | 500                          | 1.44                         | 1.07                 |                      |
|   | NFHC                                        | 1 M KOH<br>+ 0.5 urea  | 100                          | 1.40                         | 1.03                 | 14                   |
| 4 | NiMoO-Ar/NF                                 | 1 M KOH<br>+ 0.5 urea  | 100                          | 1.42                         | 1.05                 | 15                   |
|   |                                             |                        | 300                          | 1.52                         | 1.15                 |                      |
| 6 | V <sub>0</sub> -rich-CoMoO <sub>4</sub> /NF | 1 M KOH<br>+ 0.5 urea  | 100                          | 1.51                         | 1.14                 | 16                   |
| 8 | CoS <sub>2</sub> -MoS <sub>2</sub> /NF      | 1 M KOH<br>+ 0.5 urea  | 100                          | 1.33                         | 0.96                 | 17                   |
|   |                                             |                        | 350                          | 1.36                         | 0.99                 |                      |

## References

- (1) Yu, H.; Quan, T.; Mei, S.; Kochovski, Z.; Huang, W.; Meng, H.; Lu, Y. Prompt Electrodeposition of Ni Nanodots on Ni Foam to Construct a High-Performance Water-Splitting Electrode: Efficient, Scalable, and Recyclable. *Nano-Micro Lett.* **2019**, *11* (1), 41.
- (2) Xiao, C.; Li, Y.; Lu, X.; Zhao, C. Bifunctional Porous NiFe/NiCo<sub>2</sub>O<sub>4</sub>/Ni Foam Electrodes with Triple Hierarchy and Double Synergies for Efficient Whole Cell Water Splitting. *Adv. Funct. Mater.* **2016**, *26* (20), 3515–3523.
- (3) Senthil Raja, D.; Lin, H. W.; Lu, S. Y. Synergistically Well-Mixed MOFs Grown on Nickel Foam as Highly Efficient Durable Bifunctional Electrocatalysts for Overall Water Splitting at High Current Densities. *Nano Energy* **2019**, *57*, 1–13.
- (4) Chen, Z.; Xu, H.; Ha, Y.; Li, X.; Liu, M.; Wu, R. Two-Dimensional Dual Carbon-Coupled Defective Nickel Quantum Dots towards Highly Efficient Overall Water Splitting. *Appl. Catal. B Environ.* **2019**, *250*, 213–223.
- (5) Zhong, D.; Zhang, L.; Li, C.; Li, D.; Wei, C.; Zhao, Q.; Li, J.; Gong, J. Nanostructured NiFe (Oxy)Hydroxide with Easily Oxidized Ni towards Efficient Oxygen Evolution Reactions. *J. Mater. Chem. A* **2018**, *6* (35), 16810–16817.
- (6) Wang, J.; Ji, L.; Chen, Z. In Situ Rapid Formation of a Nickel-Iron-Based Electrocatalyst for Water Oxidation. *ACS Catal.* **2016**, *6* (10), 6987–6992.
- (7) Suryanto, B. H. R.; Wang, Y.; Hocking, R. K.; Adamson, W.; Zhao, C. Overall Electrochemical Splitting of Water at the Heterogeneous Interface of Nickel and Iron Oxide. *Nat. Commun.* **2019**, *10* (1), 5599.
- (8) Yu, M.; Wang, Z.; Liu, J.; Sun, F.; Yang, P.; Qiu, J. A Hierarchically Porous and Hydrophilic 3D Nickel–Iron/MXene Electrode for Accelerating Oxygen and Hydrogen Evolution at High Current Densities. *Nano Energy* **2019**, *63*, 103880.
- (9) Ahn, S. H.; Manthiram, A. Single Ni Atoms and Clusters Embedded in N-Doped Carbon

- “Tubes on Fibers” Matrix with Bifunctional Activity for Water Splitting at High Current Densities. *Small* **2020**, *16* (33), 2002511.
- (10) Patil, S. A.; Cho, S.; Jo, Y.; Shrestha, N. K.; Kim, H.; Im, H. Bimetallic Ni-Co@hexacyano Nano-Frameworks Anchored on Carbon Nanotubes for Highly Efficient Overall Water Splitting and Urea Decontamination. *Chem. Eng. J.* **2021**, *426*, 130773.
- (11) Sha, L.; Liu, T.; Ye, K.; Zhu, K.; Yan, J.; Yin, J.; Wang, G.; Cao, D. A Heterogeneous Interface on NiS@Ni<sub>3</sub>S<sub>2</sub>/NiMoO<sub>4</sub> heterostructures for Efficient Urea Electrolysis. *J. Mater. Chem. A* **2020**, *8* (35), 18055–18063.
- (12) Xu, Y.; Chai, X.; Ren, T.; Yu, S.; Yu, H.; Wang, Z.; Li, X.; Wang, L.; Wang, H. Ir-Doped Ni-Based Metal-Organic Framework Ultrathin Nanosheets on Ni Foam for Enhanced Urea Electro-Oxidation. *Chem. Commun.* **2020**, *56* (14), 2151–2154.
- (13) Sun, H.; Zhang, W.; Li, J. G.; Li, Z.; Ao, X.; Xue, K. H.; Ostrikov, K. K.; Tang, J.; Wang, C. Rh-Engineered Ultrathin NiFe-LDH Nanosheets Enable Highly-Efficient Overall Water Splitting and Urea Electrolysis. *Appl. Catal. B Environ.* **2021**, *284*, 119740.
- (14) Feng, Y.; Wang, X.; Dong, P.; Li, J.; Feng, L.; Huang, J.; Cao, L.; Feng, L.; Kajiyoshi, K.; Wang, C. Boosting the Activity of Prussian-Blue Analogue as Efficient Electrocatalyst for Water and Urea Oxidation. *Sci. Rep.* **2019**, *9* (1), 15965.
- (15) Yu, Z.-Y.; Lang, C.-C.; Gao, M.-R.; Chen, Y.; Fu, Q.-Q.; Duan, Y.; Yu, S.-H. Ni–Mo–O Nanorod-Derived Composite Catalysts for Efficient Alkaline Water-to-Hydrogen Conversion via Urea Electrolysis. *Energy Environ. Sci.* **2018**, *11* (7), 1890–1897.
- (16) Liu, Z.; Teng, F.; Yuan, C.; Gu, W.; Jiang, W. Defect-Engineered CoMoO<sub>4</sub> Ultrathin Nanosheet Array and Promoted Urea Oxidation Reaction. *Appl. Catal. A Gen.* **2020**, *602* (May), 117670.
- (17) Li, C.; Liu, Y.; Zhuo, Z.; Ju, H.; Li, D.; Guo, Y.; Wu, X.; Li, H.; Zhai, T. Local Charge Distribution Engineered by Schottky Heterojunctions toward Urea Electrolysis. *Adv. Energy Mater.* **2018**, *8* (27), 1801775.
